# Supplementary material
Source: MDPI journal article supplement (https://www.mdpi.com/2073-4433/9/12/497)
Supplement: s1 [file s1]

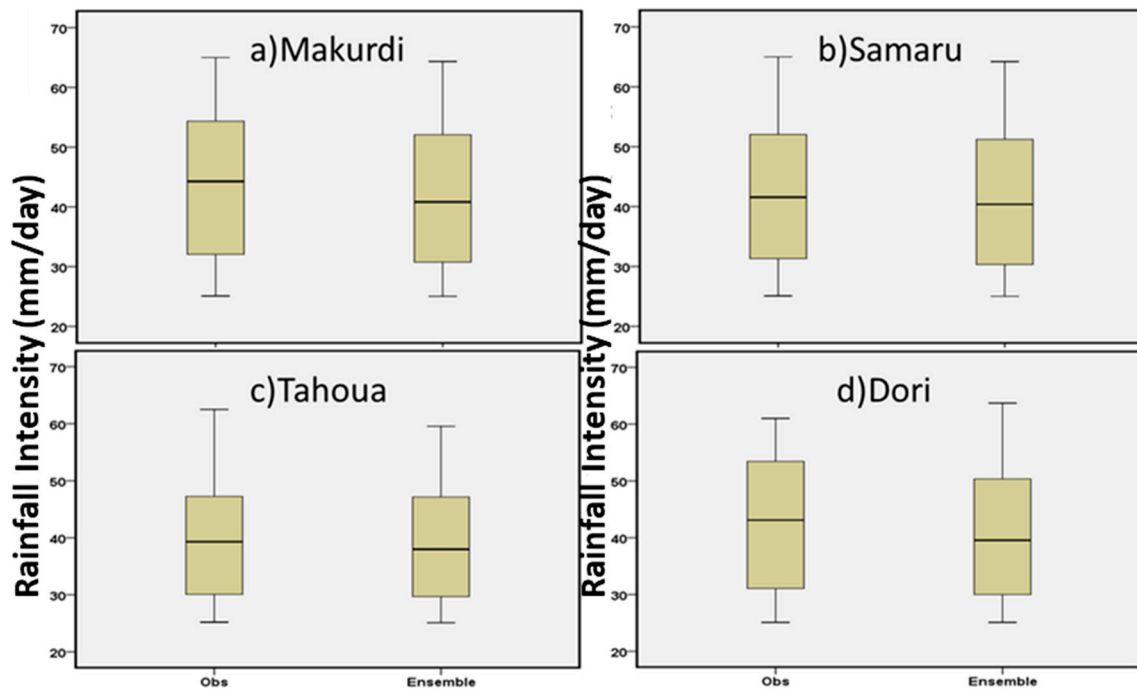

**Figure S1.** Box and Whisker plot comparing the CORDEX multi-models ensemble and observed mean daily heavy rainfall intensity (>25 to <=65mm) over the Southern (Makurdi) and Northern (Samaru) Guinea agro-ecological zones and the Sahelian (Tahoua and Dori) agro-ecological zones for the historical period, 1976/19080-2005.

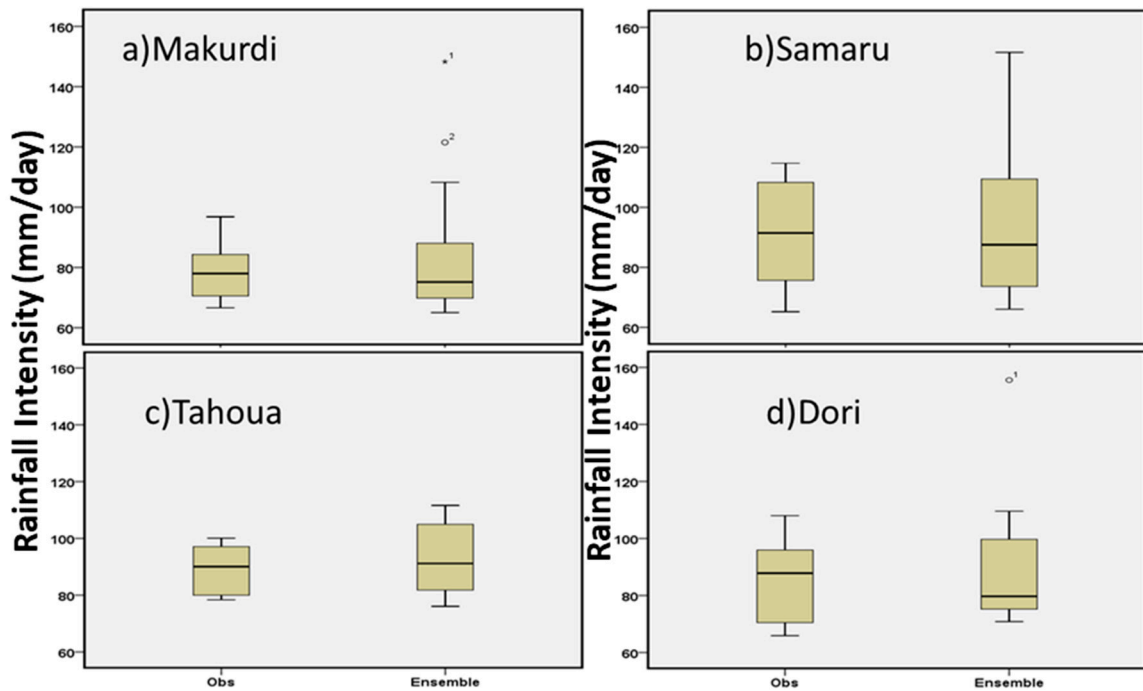

**Figure S2.** Box and Whisker plot comparing the CORDEX multi-models ensemble and observed mean daily heavy rainfall intensity (>65mm) over the Southern (Makurdi) and Northern (Samaru) Guinea

agro-ecological zones and the Sahelian (Tahoua and Dori) agro-ecological zones for the historical period, 1976/1980-2005.

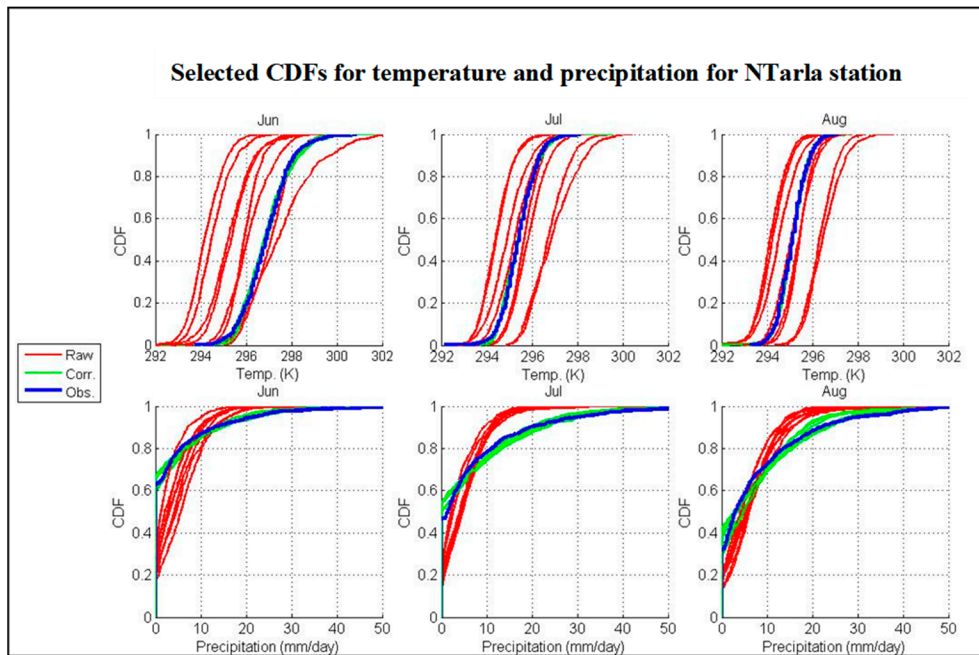

**Figure S3.** Cumulative distribution functions (CDFs) for the N'Tarla station. Minimum daily temperatures are in the top panel while precipitation values are in the bottom. Red CDFs are raw model data, green CDFs are bias corrected and blue CDFs are observed.
